# Supplementary material
Source: HighWire-hosted journal article supplement (https://ijssurgery.com/content/18/3/237)
Supplement: inline-supplementary-material-1 [file inline-supplementary-material-1.docx]

**Supplemental File**

**Additional and Unrelated Financial Disclosures and Conflicts of Interest**

Matthew F. Gornet has received royalties/licenses from Medtronic and Pioneer Surgical and consulting fees from Total Disc Replacement Solutions; owns stocks/stock options for Bonovo, International Spine & Orthopedic Institute, LLC, Aclarion, OuroBoros, and SpinaAnalytica.

Douglas P. Beall reports grants/contracts from Medtronic, Medical Metrics, Avanos, Relievant,

Boston Scientific, Stryker, Sollis Pharmaceuticals, Simplify Medical, Lenoss Medical, Spine BioPharma, Eliem, Therapeutics, Smart Soft, Tissue Tech, Vivex, Stratus Medical, Restorative Therapies, Kolon TissueGene, Companion Spine, SI Bone, and Choice Spine; royalties/licenses from IZI and Vivex; consulting fees from Medtronic, Spineology, Merit Medical, Johnson & Johnson, IZI, Techlamed, Peterson Enterprises, Medical Metrics, Avanos, Boston Scientific, Sollis Pharmaceuticals, Simplify Medical, Stryker, Lenoss Medical, SpineBioPharma, Piramal, ReGelTec, Nanofuse, Spinal Simplicity, Pain Theory, Spark Biomedical, Micron Medical Corp, Bronx Medical, Smart Soft, Tissue Tech, RayShield, Stayble, Thermaquil, Vivex, Stratus Medical, Genesys, Abbott, Eliquence, SetBone Medical, Amber Implants, Cerapedics, Neurovasis, Varian Medical Systems, Companion Spine, Discure, SpinaFX, PainTEQ, SI Bone, Orthoson, Choice Spine, Saluda Medical; payment or honoraria from Stryker, Medtronic, Boston Scientific, Merit, Avanos, Piramal, Genesys, and Eliquence; support for attenting meetings/travel from Medtronic, ReGelTec, Nanofuse, Talosix, Spinal Simplicity, Pain Theory, Spark Biomedical, Smart Soft, Tissue Tech, Bronx Medical, Thermaquil, Vivex, Genesys, SetBone Medical, Amber Implants, Cerapedics, SpinaFX, SI Bone; patents (Application No.15/036,169, Issue Date 3/26/2019, Patent No. 10238450, Attorney Docuet No 50950-00005, Confirmation No 5639); and participating on the following boards:

- National Institutes of Health (NIH) - National Institute of Arthritis and Musculoskeletal and Skin Diseases (NIAMS), NIAMS Observational Study Monitoring Board (OSMB)/Data and Safety Monitoring Board (DSMB) for the following three Mechanistic Research Center (MRC) studies within the NIH Back Pain Consortium (BACPAC) Research Program:
  - University of Michigan BACPAC Mechanistic Research Center (1 U19 AR076734-01)
  - UCSF Core Center for Patientcentric Mechanistic Phenotyping in Chronic Low Back Pain” (1 U19 AR076737-01)
  - HEALing LB3P: Profiling Biomechanical, Biological and Behavioral Phenotypes” (1 U19 AR076725-01)
- National Institutes of Health (NIH) - NIAMS – Safety Officer for:
  - Observational Study Monitoring Board (OSMB)/Data and Safety Monitoring Board (DSMB) for the Mechanistic Research Center (MRC) studies within the NIH Back Pain Consortium (BACPAC) Research Program

Timothy T. Davis has received research funding from Xalud, Mesoblast, Kolon Tissuegene, Spine Biopharma, Nature Cell, SI Bone, and Vivex, and receiving payment/honoraria for teaching/education from Abbott and Biotronik.

Domagoj Coric has received royalties/licenses from SpineWave, Medtronic, Globus Medical, Stryker, and Integrity Implants; has received consulting fees from SpineWave, Medtronic, and Globus Medical; patents (planned, issued, or pending) from Medtronic; participation on a data safety monitoring or advisory board for Globus Medical; and receiving stock/stock options from SpineWave, Premia Spine, and 3Spine.

Michael LaBagnara is a consultant for Medtronic (2020-present).

Angela Krull has nothing to report.

Michael J. DePalma has received grants or contracts from Mesoblast, BioRestorative Therapies, Spine BioPharma, and SPR (grants to support clinical trial at institution); has patents planned, issued, or pending from iSpine Ingenuity for a drug compound; participated in a data safety monitory board for AnGes; and owns stock for iSpine Ingenuity.

Patrick C. Hsieh has received royalties/licenses from Medtronics, NuVasive, and Zimmer Biomet and serves on the North American Spine Society Board of Directors.

Srinivas Mallempati has nothing to report.

Francine W. Schranck stock/stock options in Aclarian.

Colleen Kelly has nothing further to report.

Kevin T. Foley has received royalties/licenses and consulting fees from Medtronic; has patents planned, issued, or pending with Medtronic (royalties) and NuVasive and RevBio (no payments); serves on the board of directors for Durastat, and RevBio; and owns stock in Accelus, Durastat, Medtronic, Nuvasive, RevBio, and Spine Wave.
